# Supplementary material
Source: PubMed Central journal article supplement (PMC6390950)
Supplement: NIHMS81914-supplement-Supplementary_Tables.pdf [file NIHMS81914-supplement-Supplementary_Tables.pdf]

a) Primary antibodies

| Target                        | Host   | Dilution | Supplier                     |
|-------------------------------|--------|----------|------------------------------|
| Parvalbumin                   | Goat   | 1/500    | Swant (PVG-213)              |
| Parvalbumin                   | Mouse  | 1/1000   | Swant (PV 235)               |
| Vasoactive intestinal peptide | Rabbit | 1/500    | ImmunoStar anti-VIP (#20077) |
| Somatostatin                  | Rat    | 1/200    | Millipore (MAB354)           |

b) Secondary antibodies

| Genotype     | Primary         | Secondary       | Code number |
|--------------|-----------------|-----------------|-------------|
| WT           | Mouse-anti PV   | DyLight 405     | 715-475-150 |
|              | Rabbit-anti VIP | Rhodamine Red X | 711-295-152 |
|              | Rat-anti SOM    | Alexa 647       | 712-605-153 |
| PV-tdTomato  | Mouse-anti PV   | Alexa 594       | 715-585-151 |
|              | Rabbit-anti VIP | Alexa 647       | 711-605-152 |
|              | Rat-anti SOM    | DyLight 405     | 712-475-153 |
| VIP-tdTomato | Goat-anti PV    | DyLight 405     | 705-475-147 |
|              | Rabbit-anti VIP | Rhodamine Red X | 711-295-152 |
|              | Rat-anti SOM    | Alexa 647       | 712-605-153 |

**Supplementary Table 1. a, b)** Primary and secondary antibodies used in this study. All antibodies were applied in blocking buffer. All secondary antibodies were from Jackson ImmunoResearch and were used at 1/200 dilution.

a) Numbers and percentages of immuno-labelled cells that were also identified as belonging to the same interneuron class by transgenic labelling:

| <b>Genotype</b> | <b>Immuno +</b> | <b>Also tdTomato +</b> | <b>Percent</b> |
|-----------------|-----------------|------------------------|----------------|
| PV              | 250             | 236                    | 94.4%          |
| SOM             | 167             | 164                    | 98.2%          |
| VIP             | 152             | 139                    | 91.4%          |

b) Numbers and percentages of transgenically labelled cells that were also identified as belonging to the same interneuron class by immunostaining:

| <b>Genotype</b> | <b>tdTomato +</b> | <b>Also Immuno +</b> | <b>Percent</b> |
|-----------------|-------------------|----------------------|----------------|
| PV              | 312               | 289                  | 92.6%          |
| SOM             | 278               | 195                  | 70.1%          |
| VIP             | 233               | 188                  | 85.4%          |

**Supplementary Table 2. a, b)** Measure of overlap of labelling by immunostaining and transgenic mouse lines.
